# Supplementary material
Source: PubMed Central journal article supplement (PMC4018842)

## Supplementary Files

### Supplementary File 1: Oligonucleotides used in this study

| Primer                      | Sequence (5'-3') <sup>a</sup>              | Properties                               |
|-----------------------------|--------------------------------------------|------------------------------------------|
| <b><i>A. niger</i></b>      |                                            |                                          |
| AnXlnRNotIup                | ATGCAT <u>GCGGCCG</u> CTCCCAACTTTATCACTCCC | <i>xlnR</i> deletion upstream external   |
| AnXlnRHindIIIup             | ATGCATA <u>AAGCTT</u> GGAATTCGCAAGGAAGTGG  | <i>xlnR</i> deletion upstream internal   |
| AnXlnRHindIIIdw             | ATGCATA <u>AAGCTT</u> TTTTGCAGTAACACGGCTG  | <i>xlnR</i> deletion downstream internal |
| AnXlnRSpel dw               | ATGCATA <u>CTAGT</u> ACTCACGGGATCCACGAAG   | <i>xlnR</i> deletion downstream external |
| AnXlnRScexup                | CAGACTGAATCGGCAATGC                        | Screen <i>xlnR</i> deletion, external    |
| AnXlnRScexdw                | GTTTAAAGGAGGGGGTTTGG                       | Screen <i>xlnR</i> deletion, external    |
| AnXlnRScinup                | CACCATCTGAGCTCGCAGCC                       | Screen <i>xlnR</i> deletion, internal    |
| AnXlnRScindw                | GCAGTTTCTGGCATAACG                         | Screen <i>xlnR</i> deletion, interna     |
| AnXlnRSopr dw               | GAGTTTTACCTCTGATGGC                        | Probe for Southern                       |
| AnXlnRSopr dw               | ACCGGGTAAAAAAGTCAAG                        | Probe for Southern                       |
| <b><i>T. versatilis</i></b> |                                            |                                          |
| TvXlnRSpelup                | TTCTCTG <u>CTAGT</u> CGATTCTTCTGG          | <i>xlnR</i> deletion upstream external   |
| TvXlnRApaup                 | TTATAGAAGGGCCCAACCGAAGTCCAC                | <i>xlnR</i> deletion upstream internal   |
| TvXlnRApadw                 | AACGACGGGCCAGGTTCTTGCACTTTATC              | <i>xlnR</i> deletion downstream internal |
| TvXlnRSpedw                 | AACCTC <u>CTAGT</u> CAGCGTCTTCAGCCG        | <i>xlnR</i> deletion downstream external |
| TvxlnRScexup                | CTGTGATTCGGTTGCTTTCTGG                     | Screen <i>xlnR</i> deletion, external    |
| TvxlnRScexdz                | TCGCATCGCTAACAGACAACG                      | Screen <i>xlnR</i> deletion, external    |

<sup>a</sup> Restriction sites for endonuclease used are underlined.

**Supplementary File 2: Screen and confirmation of *xlnR* deletion in *A. niger* and *T. versatilis*.** A) *xlnR* deletion in *A. niger*. Ten randomly chosen 5FoA-resistant clones, annotated 1 to 10 were tested by PCR for *xlnR* deletion using external (upper panel) and internal (lower panel) primers to the deletion. “M” line is 1 kb ladder from NEB. Clones 4, 5, 8 and 10 exhibited *xlnR* deletion (i.e. expected 1020 bp band for the PCR with external primer and no band for the PCR with the internal primer). B) *xlnR* deletion strain in *T. versatilis*. Nine randomly chosen 5FoA-resistant clones (annotated 1 to 9) were tested by PCR for *xlnR* deletion using external primers to the deletion. “M” line is 1 kb ladder from NEB and “wt” line control PCR with *T. versatilis* DNA. Clones 1, 3, 4, 5 and 7 exhibited *xlnR* deletion (i.e. expected 673 bp band for the deletion).

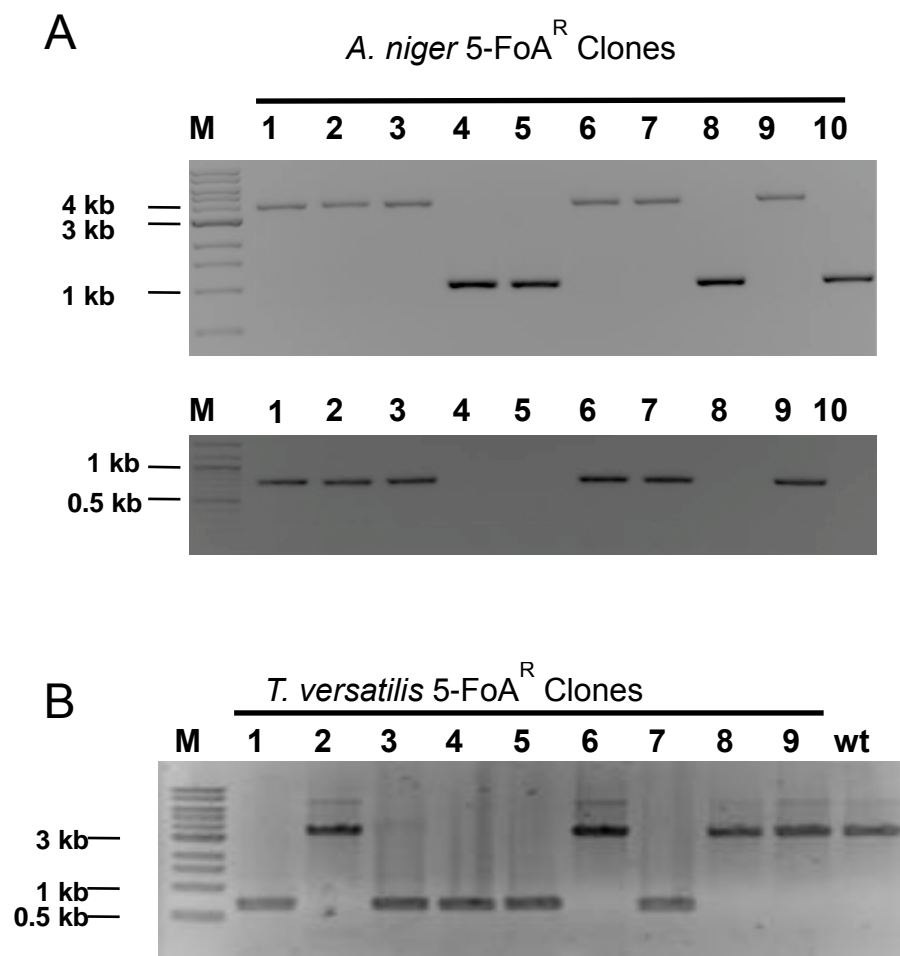

**Supplementary File 3: Verifying that no extra copies of the plasmid remain in the *xlnR* deleted strain of *A. niger*.** Wild-type and *xlnR*-deleted *A. niger* strain genomic DNA was cut with *BglII* and a Southern blot hybridisation performed using the complete plasmid pC3-*An\_ΔxlnR* as a probe. Line M represents the 1kb ladder. The expected band for the AB4.1 strain was 6908 bp and for the *xlnR* deletion 4162 bp. Note that a band of ca. 6kb is predicted to be present in both the WT and *xlnR*-deleted *A. niger* strains but was not detected, probably because of the relatively small region of homology to the very large, whole plasmid, probe.

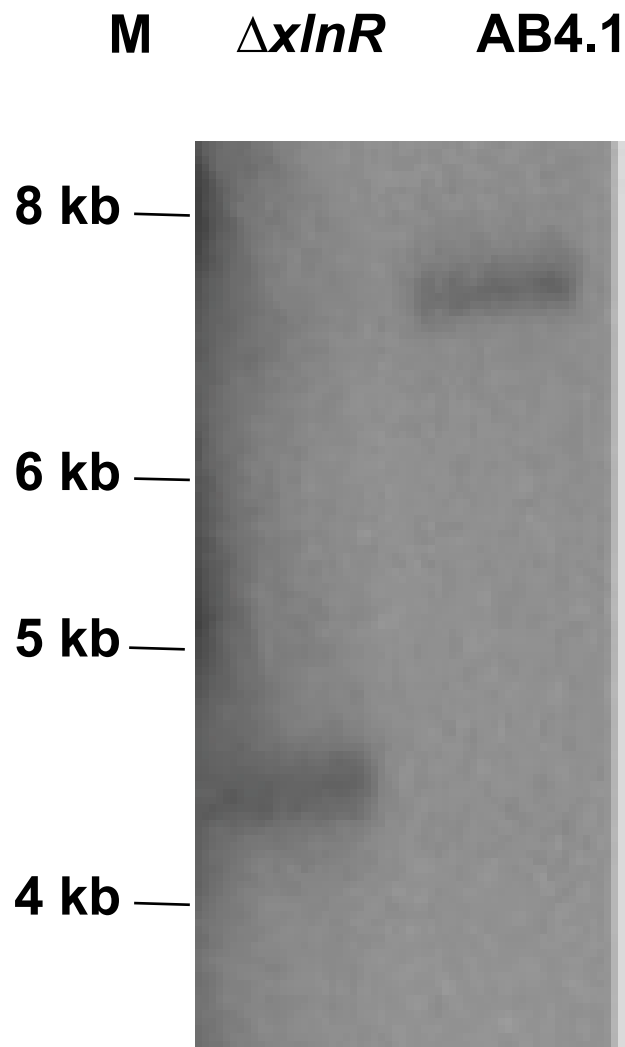

Supplement: AEM.00625-14_zam999105387so1.pdf [file AEM.00625-14_zam999105387so1.pdf]
